# Supplementary material
Source: HighWire-hosted journal article supplement (https://bmjopen.bmj.com/content/12/7/e059499)
Supplement: inline-supplementary-material-3 [file inline-supplementary-material-3.pdf]

**Annex C: Participant characteristics (pseudonyms)**

| <b>Participant</b> | <b>Age</b> | <b>Country</b>                | <b>Reported pre-existing conditions</b> | <b>Covid-19 status</b>  |
|--------------------|------------|-------------------------------|-----------------------------------------|-------------------------|
| Hans               | 76         | Bavaria, Germany              | yes                                     | unknown                 |
| Silke              | 72         | Nordrhein-Westphalen, Germany | yes                                     | unknown                 |
| Rainer             | 77         | Nordrhein-Westphalen, Germany | yes                                     | unknown                 |
| Susanne            | 70         | Hessen, Germany               | no                                      | unknown                 |
| Tina               | 72         | Nordrhein-Westphalen, Germany | yes                                     | unknown                 |
| Timo               | 74         | Baden-Württemberg, Germany    | yes                                     | unknown                 |
| Hilde              | 81         | Hamburg, Germany              | no                                      | unknown                 |
| Anna               | 62         | Nordrhein-Westphalen, Germany | no                                      | unknown                 |
| Günther            | 57         | Bavaria, Germany              | no                                      | unknown                 |
| Sebastian          | 67         | Baden-Württemberg, Germany    | yes                                     | unknown                 |
| Hannah             | 80         | Baden-Württemberg, Germany    | yes                                     | unknown                 |
|                    |            |                               |                                         |                         |
| Maggie + John      | 74 + 76    | England                       | yes + no                                | unknown                 |
| Rose               | 70         | England                       | no                                      | tested + for antibodies |
| Jamie              | 75         | England                       | yes                                     | unknown                 |
| Andrew             | 82         | England                       | yes                                     | unknown                 |
| Heath              | 74         | Scotland                      | no                                      | unknown                 |
| Lily               | 79         | England                       | no                                      | unknown                 |
| Robert             | 78         | England                       | yes                                     | unknown                 |
